# Supplementary material
Source: Springer Nature journal article supplement (https://www.springermedizin.de/resource/supplementary/12967_2014_1907_MOESM1_ESM.pdf/9575114)
Supplement: MOESM1 [file 9575114]

(A) RVR all genotypes

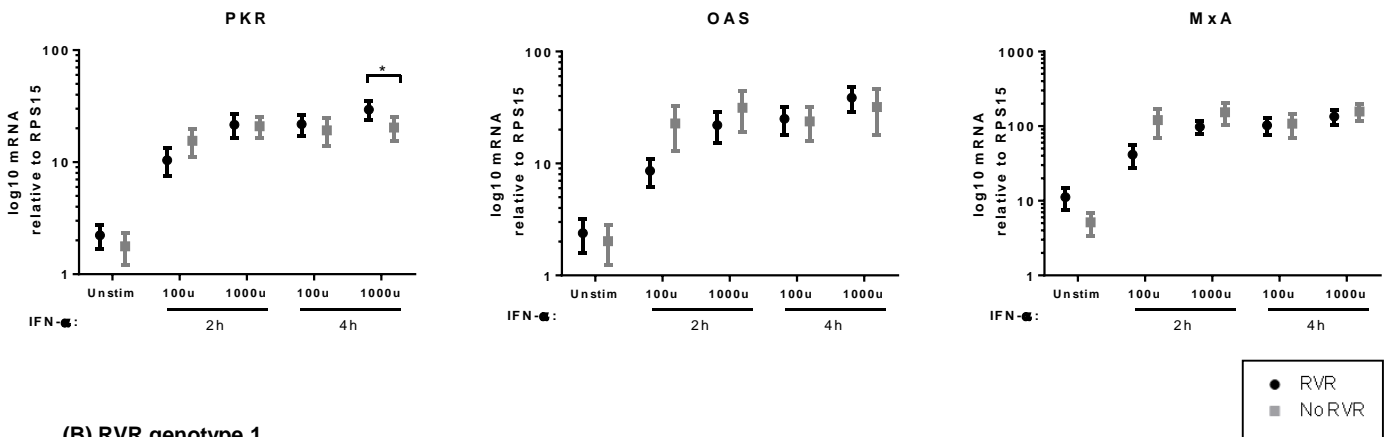

(B) RVR genotype 1

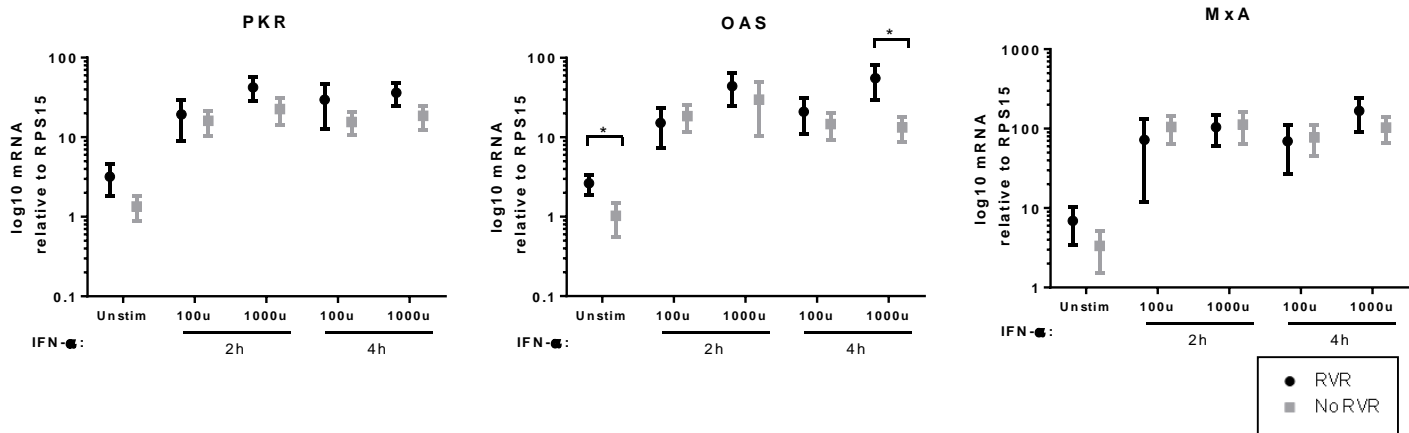

(C) RVR genotype 3

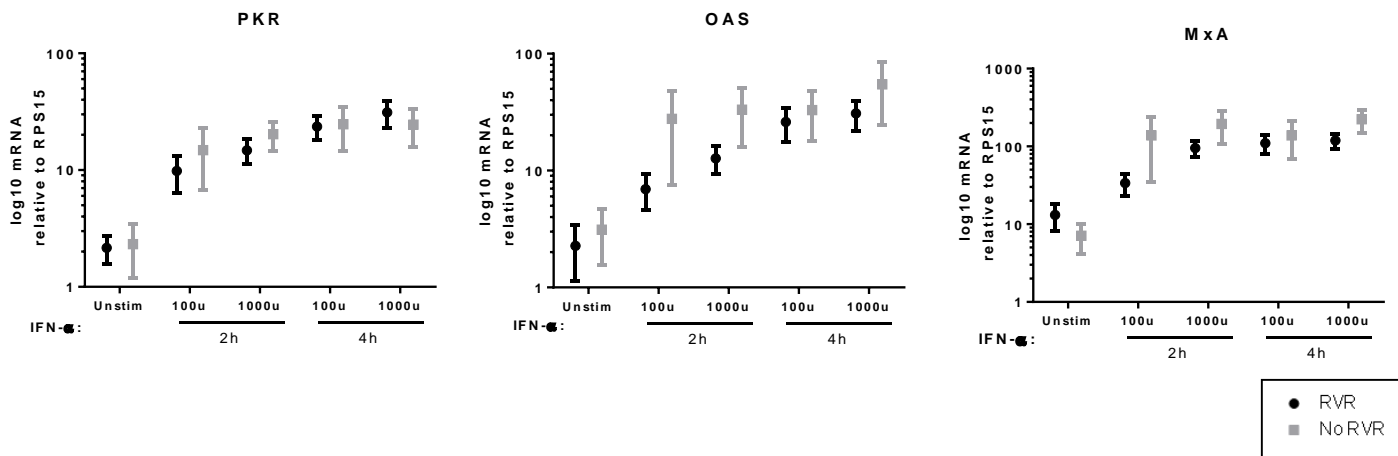

**Supplemental Figure 1. Correlation between RVR and ISG expression.** PBMCs were isolated from HCV infected patients prior to them commencing IFN- $\alpha$  therapy and were stimulated *in vitro* with 100IU or 1000IU of IFN- $\alpha$  for 2 or 4h. qRT-PCR was used to quantify ISG expression. Analysis stratified into those who achieved RVR and those who did not. (A) all viral genotypes, (B) genotype 1 infected patients and (C) genotype 3 infected patients. All gene expression was normalised to expression of the internal control gene RPS15 and expressed on a log scale. Mean and standard error of the mean (SEM) shown. Mann-Whitney statistical analysis, \* $p < 0.05$ .

**(A) EVR all genotypes**

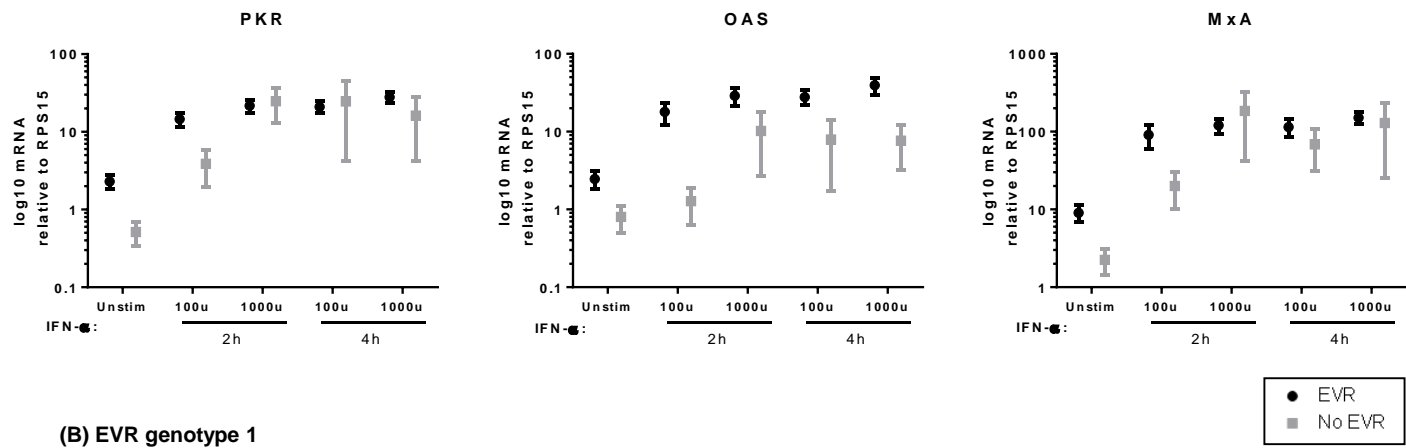

**(B) EVR genotype 1**

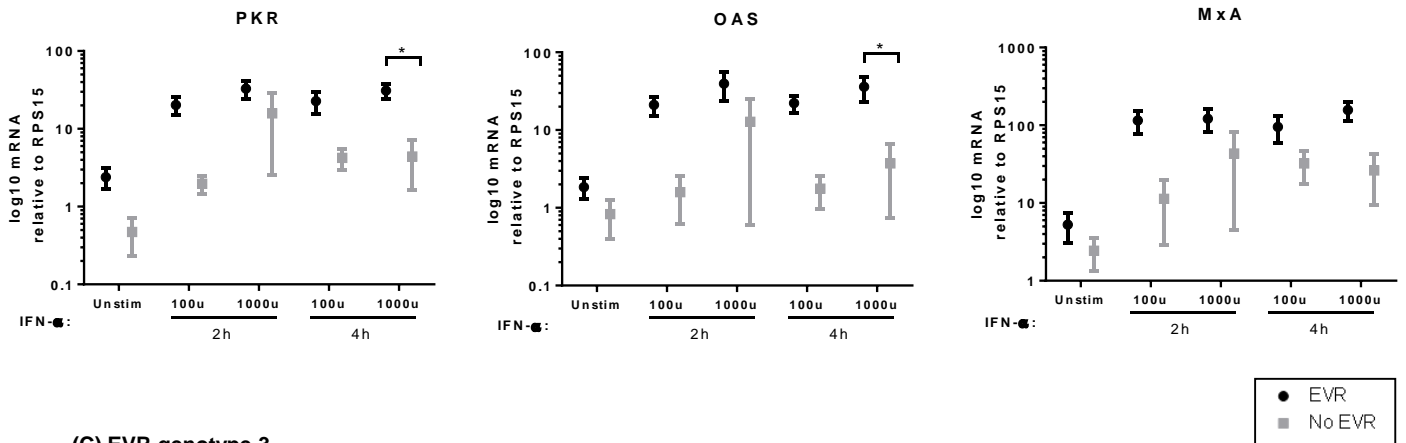

**(C) EVR genotype 3**

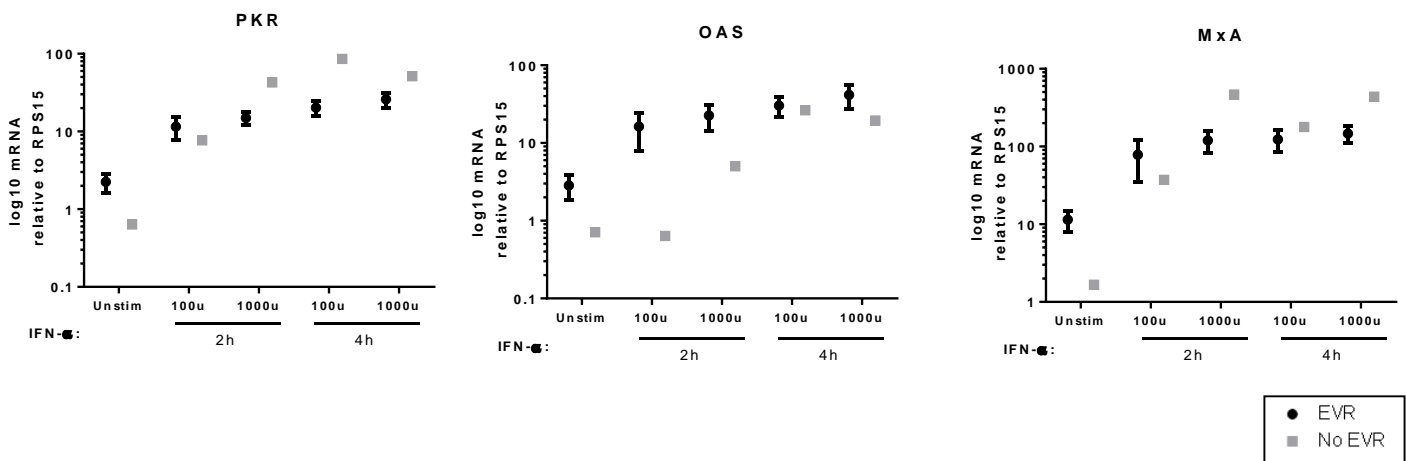

**Supplemental Figure 2. Correlation between EVR and ISG expression.** PBMCs were isolated from HCV infected patients prior to them commencing IFN-α therapy and were stimulated *in vitro* with 100IU or 1000IU of IFN-α for 2 or 4h. qRT-PCR was used to quantify ISG expression. Analysis stratified into those who achieved EVR and those who did not. (A) all viral genotypes (B) genotype 1 infected patients and (C) genotype 3 infected patients. All gene expression was normalised to expression of the internal control gene RPS15 and expressed on a log scale. Mean and standard error of the mean (SEM) shown. Mann-Whitney statistical analysis, \*p<0.05.

**(A) EOT response all genotypes**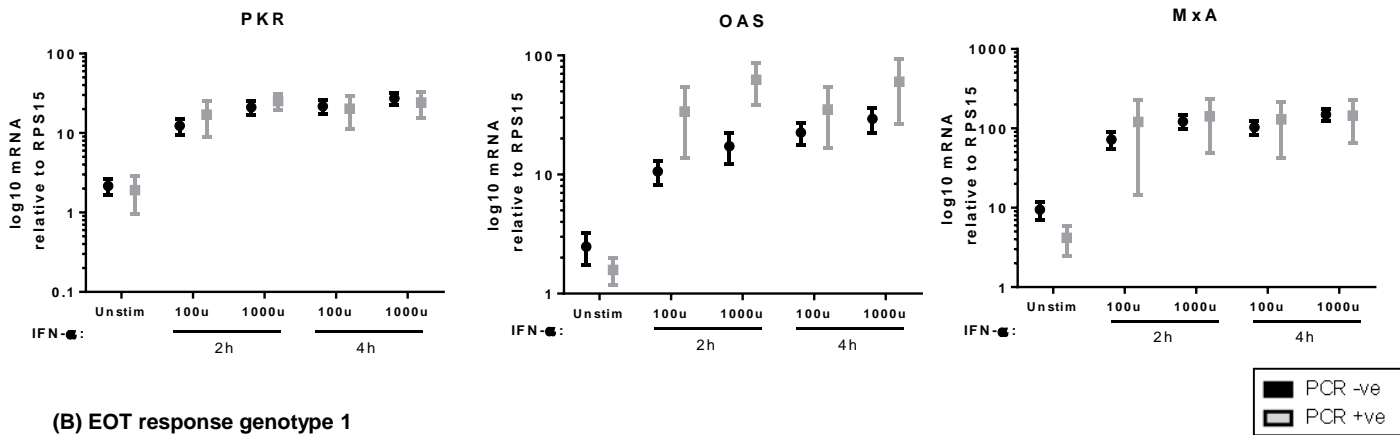**(B) EOT response genotype 1**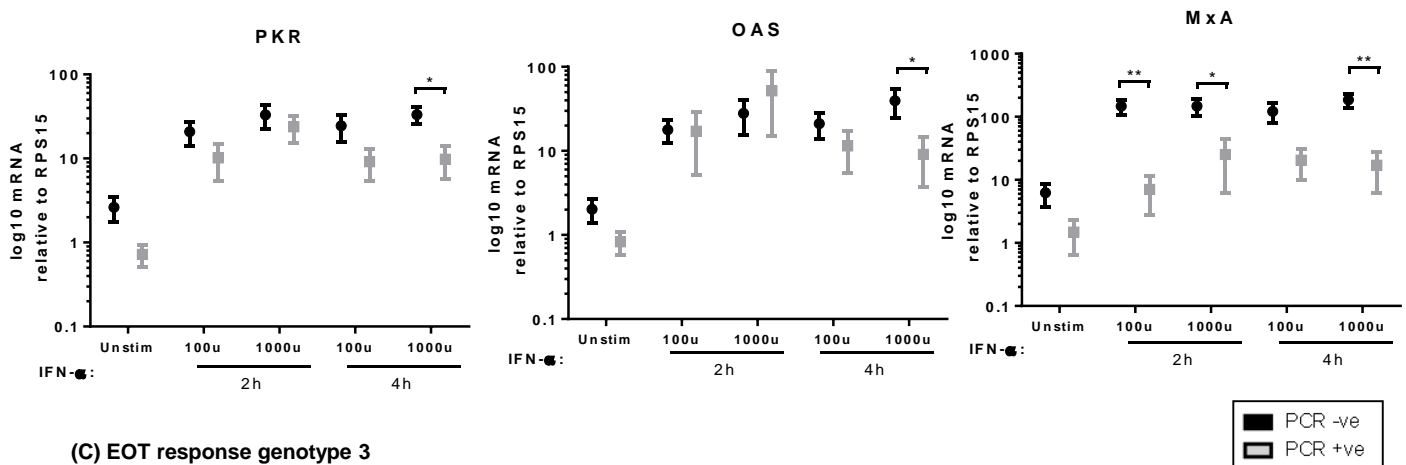**(C) EOT response genotype 3**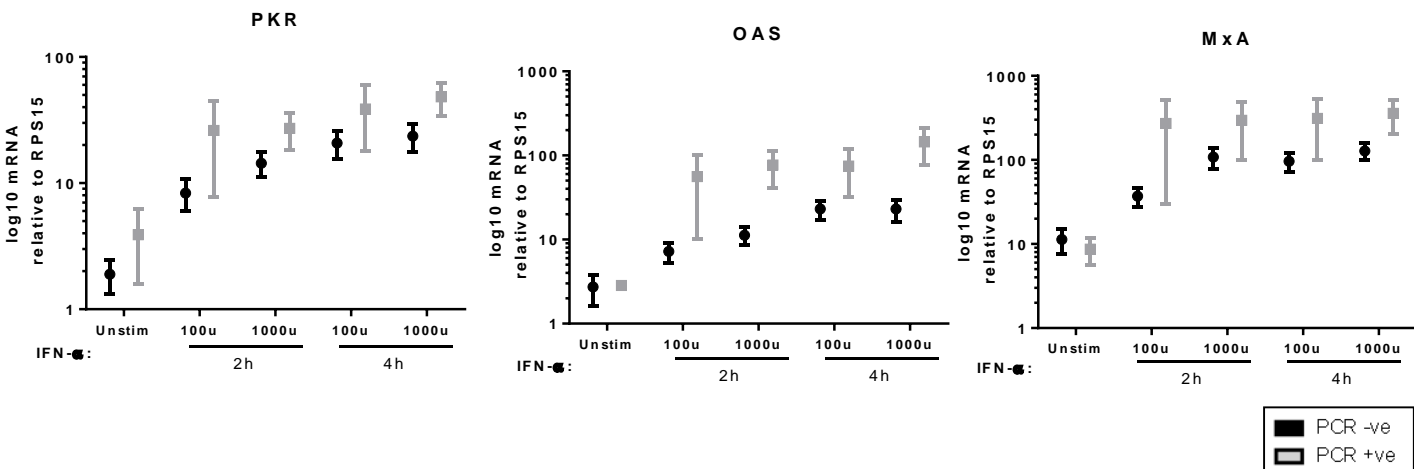

**Supplemental Figure 3. Correlation between EOT response and ISG expression.** PBMCs were isolated from HCV infected patients prior to them commencing IFN- $\alpha$  therapy and were stimulated *in vitro* with 100IU or 1000IU of IFN- $\alpha$  for 2 or 4h. qRT-PCR was used to quantify ISG expression. Analysis stratified into those who were PCR -ve at EOT and those who were PCR +ve. (A) all viral genotypes, (B) genotype 1 infected patients and (C) genotype 3 infected patients. All gene expression was normalised to expression of the internal control gene RPS15 and expressed on a log scale. Mean and standard error of the mean (SEM) shown. Mann-Whitney statistical analysis, \*p<0.05, \*\*p<0.01.

| Variables | AUC  | 95% CI   | Cut-Off | Sensitivity (%) | Specificity (%) | PPV (%) | NPV (%) | Likelihood ratio |
|-----------|------|----------|---------|-----------------|-----------------|---------|---------|------------------|
| PKR       | 0.86 | 0.67-1.1 | 27.56   | 100             | 62.5            | 100     | 72.7    | 2.7              |
| OAS       | 0.94 | 0.82-1.1 | 31.92   | 100             | 62.5            | 100     | 72.7    | 2.7              |
| MxA       | 0.94 | 0.82-1.1 | 91.72   | 100             | 87.5            | 100     | 88.9    | 8                |

**Supplemental Table 1.** Predictability of SVR based on cut-off gene expression values

Gene cut off values quantified following 4h *in vitro* IFN- $\alpha$  stimulation, as determined by qRT-PCR, were analysed to predict response of g1 infected patients to respond to therapeutic IFN- $\alpha$  using receiver operating characteristic (ROC) analysis. AUC: area under curve in ROC analysis, CI: confidence intervals, PPV: positive predictive value, NPV: negative predictive value.
